# Supplementary material
Source: PubMed Central journal article supplement (PMC1637571)

**A**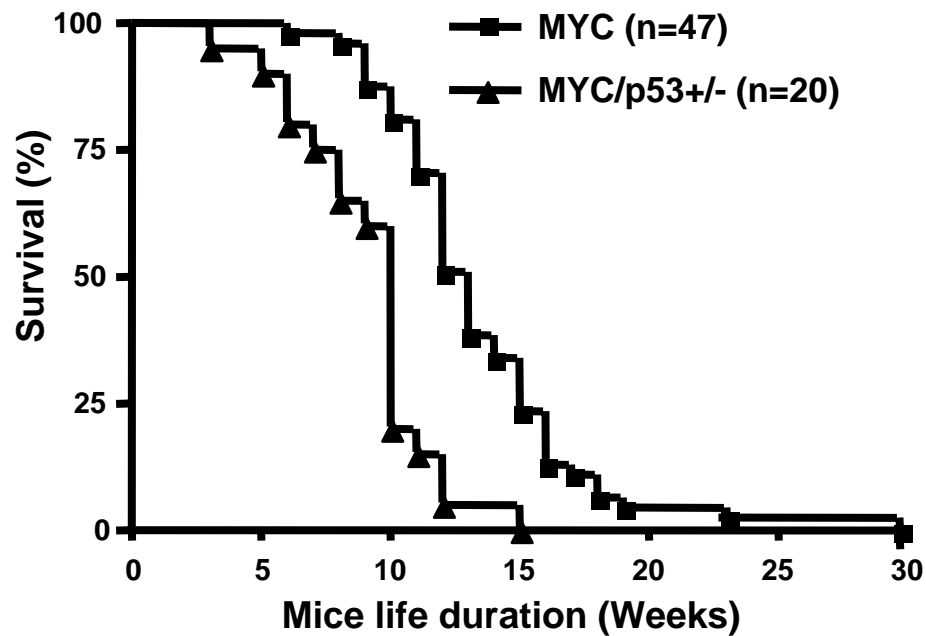**B**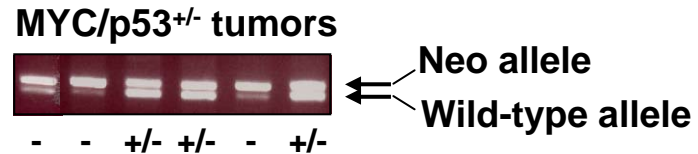

Supplement: pnas_0608017103_1.pdf [file pnas_0608017103_1.pdf]

**A**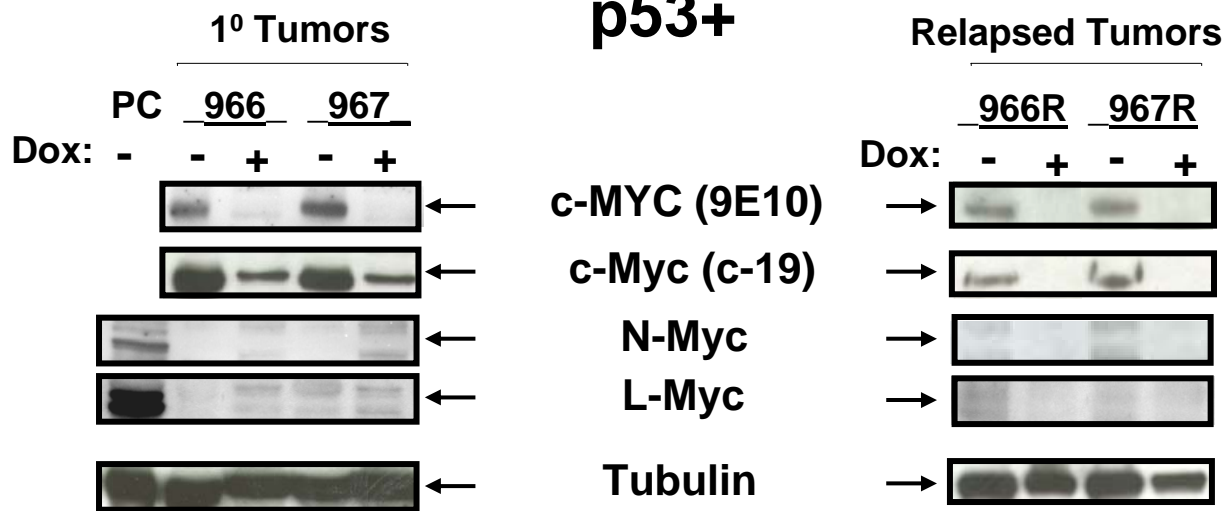**B**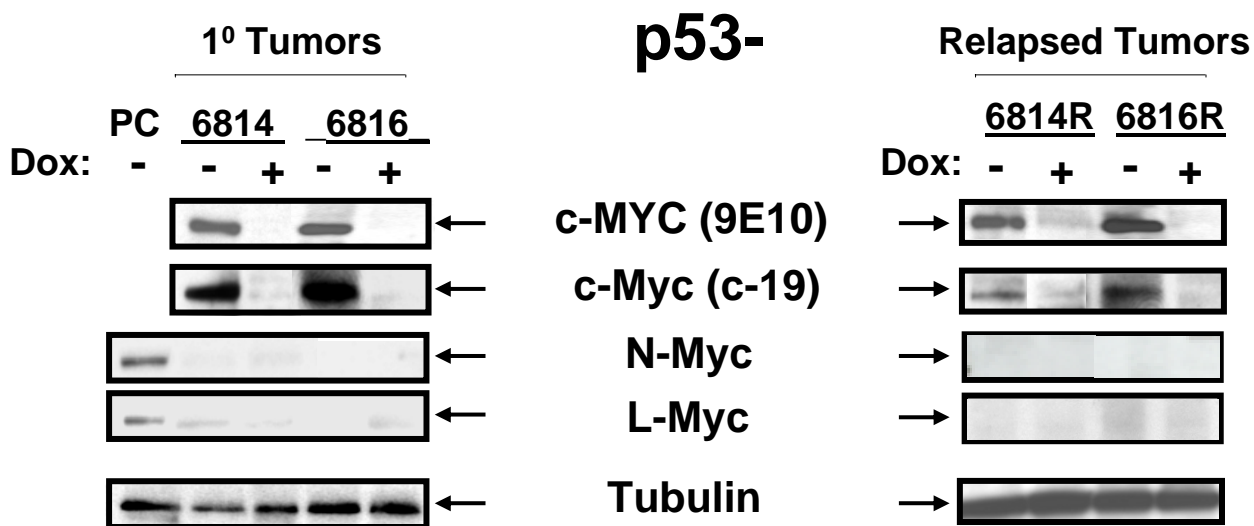

Supplement: pnas_0608017103_2.pdf [file pnas_0608017103_2.pdf]

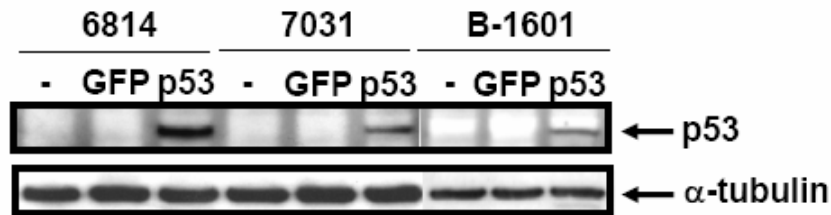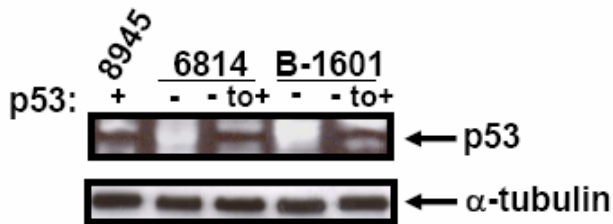

Supplement: pnas_0608017103_3.pdf [file pnas_0608017103_3.pdf]

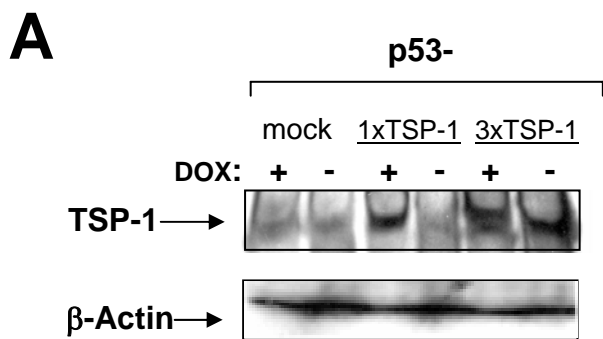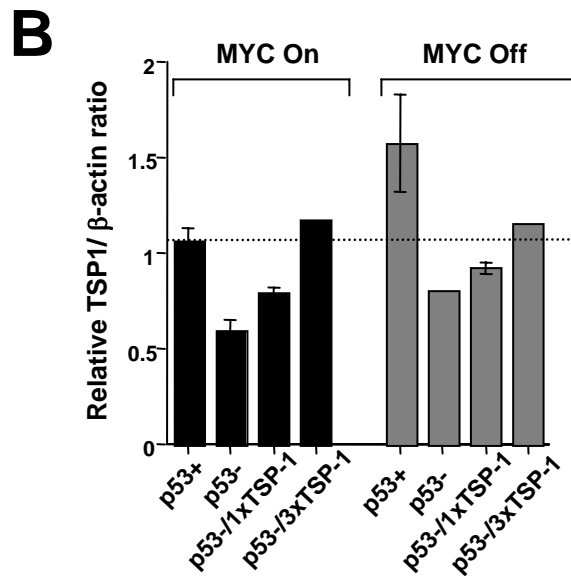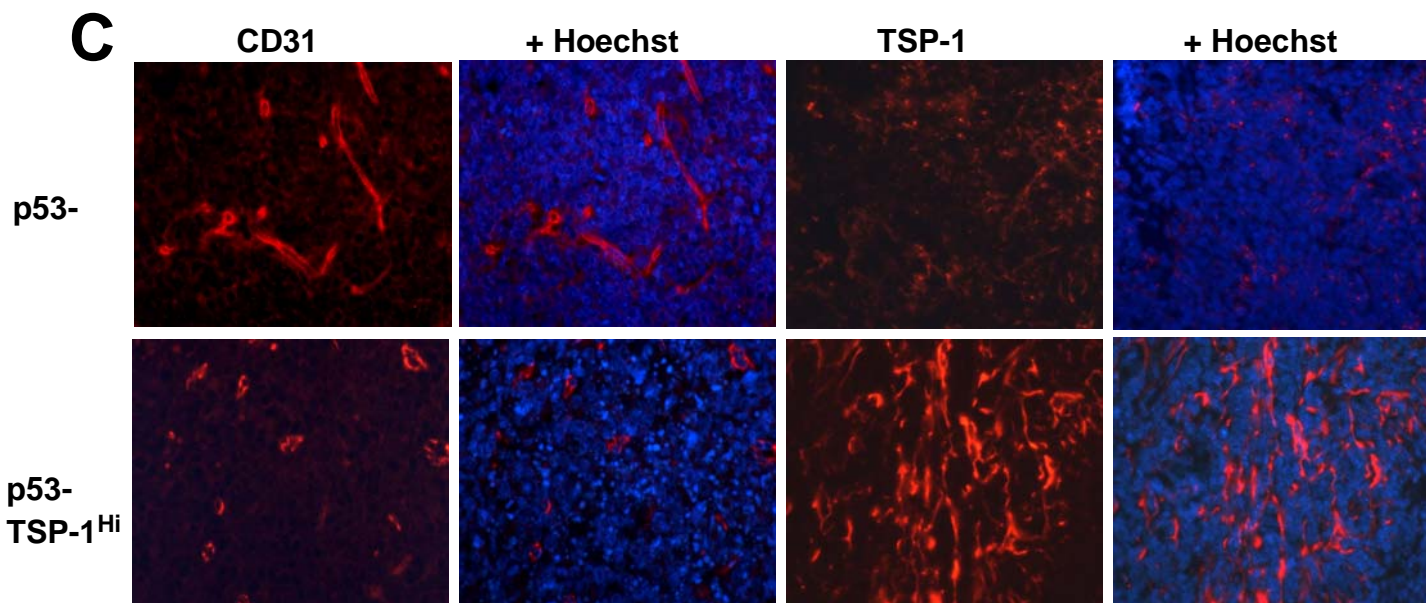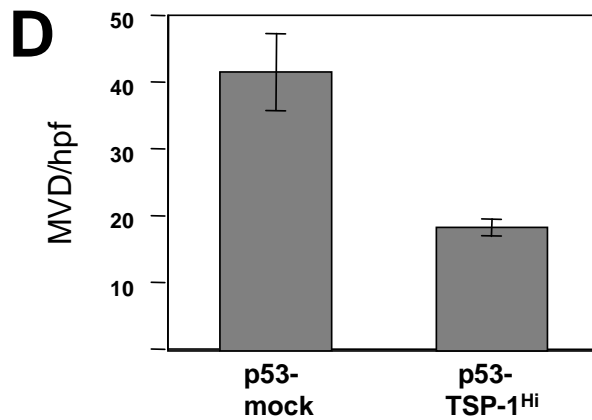

Supplement: pnas_0608017103_4.pdf [file pnas_0608017103_4.pdf]
